# Supplementary material for: Immunological Profile and Markers of Endothelial Dysfunction in Elderly Patients with Cognitive Impairments
Source: MDPI journal article supplement (doi:10.3390/ijms25031888), 2024-02-04
Supplement: s1 [file s1]

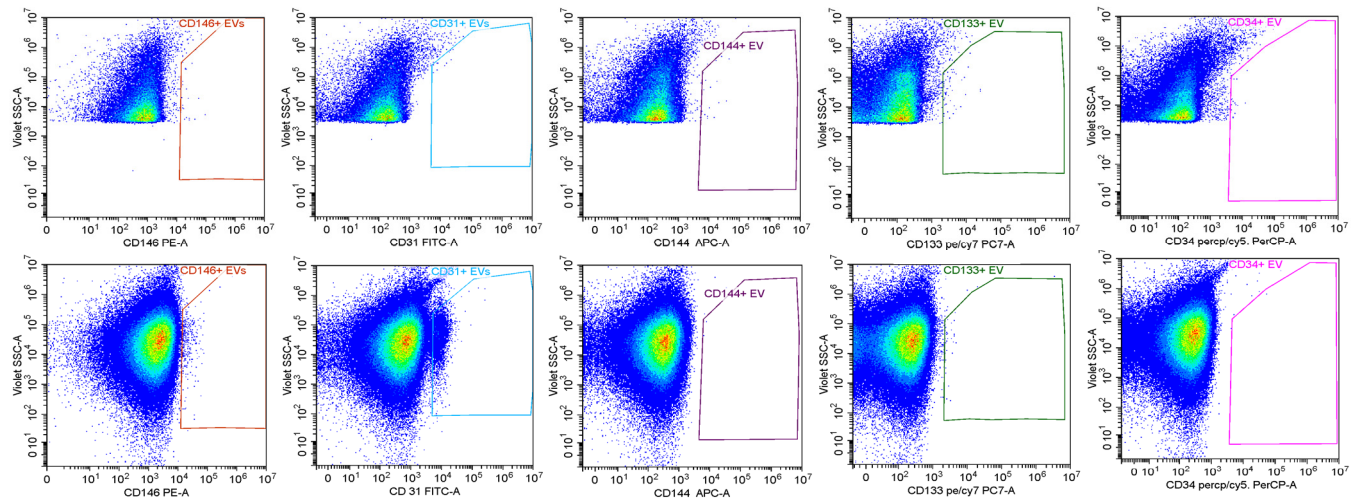

Supplementary Figure S1. Representative pseudo color dot plots of the EVs phenotyping results (bottom row) compared to appropriate fluorescent monoclonal antibodies (upper row). Columns representing appropriate EVs: 1. CD 146+ EV. 2. CD31+ EV. 3. CD144+EV. 4. CD133 EV. 5. CD34 EV.
